# Supplementary material for: COVID-19 Pandemic: Increased risk for psychopathology in Children and Adolescents?
Source: Research Square preprint supplement (doi:10.21203/rs.3.rs-104507/v1), 2020-11-11
Supplement: Supplementary file 1 [file 57a054849acea39a5ba58d04.docx]

**Supplementary Text 1.**

PSC Scale: psychometric data and scale adaptation.

Each item is rated on a 0(never)-2(often) Likert scale. A clinically significant score is obtained either by exceeding the cut-off (24 or 28 points, age-dependent) or by increasing on 6 or more points with respect to a prior evaluation (PSC+) (Murphy et al., 2016). The PSC scale has a positive predictive value of 68% and a negative predictive value of 95% and high internal consistency (Cronbach alpha = .91) (Jellinek et al., 1988; Murphy, J. M., Arnett, H. L., Bishop, S. J., Jellinek, M. S., Reede, 1992).

Due to school closures and confinement, certain items required adaptation. Explanatory parentheses were added. Specifically , item 5: Problems with teacher *if there is no school, with adults at home; item 6: Less interested in school *if there is no school, with related topics; item 16: Fights with other children *if no meeting with other children, assess if it would be possible; item 17: Does not attend school *if there is no school, does not accept school-online contact; item 18: Worsens their grades *if there is no school, assess if their performance is falling.

Social Readjustment Scale for children (SLE) scale

Some examples of SLE are the death of a parent, death of a sibling, the diagnosis of a heath condition, starting school for the first time, among others.

The current confinement situation and the use of some non-peninsular Spanish terms could lead to confusion. For these reasons, minimal situational/cultural adaptations were made in some Spanish-Mexican to some Spanish-Spain items (e.g. “reprobación” by “suspensión”)

**REFERENCES**

Jellinek, M. S., Murphy, J. M., Robinson, J., Feins, A., Lamb, S., & Fenton, T. (1988). Pediatric Symptom Checklist: Screening school-age children for psychosocial dysfunction. *The Journal of Pediatrics*, *112*(2), 201–209. https://doi.org/psychi8

Murphy, J. M., Arnett, H. L., Bishop, S. J., Jellinek, M. S., Reede, J. Y. (1992). Screening for psychosocial dysfunction in pediatric practice. A naturalistic study of the Pediatric Symptom Checklist. *Clinical Pediatrics*, *31*(11), 660–667. https://doi.org/DOI: 10.1177/000992289203101104

Murphy, J. M., Bergmann, P., Chiang, C., Sturner, R., Howard, B., Abel, M. R., & Jellinek, M. (2016). The PSC-17: Subscale scores, reliability, and factor structure in a new national sample. *Pediatrics*, *138*(3). https://doi.org/10.1542/peds.2016-0038
